1 **High proportions of single-nucleotide variations associated**  
2 **with multidrug resistance in swine gut microbial populations**

3

4

5 Brandi Feehan<sup>1</sup>, Qinghong Ran<sup>1</sup>, Kourtney Monk<sup>1</sup>, T. G. Nagaraja<sup>2</sup>, M. D. Tokach<sup>3</sup>,  
6 Raghavendra G. Amachawadi<sup>\*4</sup>, and Sonny T M Lee<sup>\*1</sup>

7

8 \*Corresponding authors

9

10 <sup>1</sup>Division of Biology, College of Arts and Sciences, Kansas State University, Manhattan,  
11 Kansas, 66506, United States of America.

12

13 <sup>2</sup>Department of Diagnostic Medicine/Pathobiology, College of Veterinary Medicine,  
14 Kansas State University, Manhattan, Kansas 66506, United States of America.

15

16 <sup>3</sup>Department of Animal Sciences & Industry, College of Agriculture, Kansas State  
17 University, Manhattan, Kansas 66506, United States of America.

18

19 <sup>4</sup>Department of Clinical Sciences, College of Veterinary Medicine, Kansas State  
20 University, Manhattan, Kansas 66506, United States of America.

21

22 **Keywords:** Swine, Antimicrobials, AMR, Microbiome, Resistome, MDR, MDRO

23

24

25

26

27 **Abstract**

28

29 **Background:** Antimicrobial resistance (AMR) is a significant global public health  
30 concern associated with millions of deaths annually. Agriculture has been attributed as  
31 a leading factor in AMR and multidrug resistance (MDR) associated with swine  
32 production estimated as one of the largest agricultural consumers of antibiotics.  
33 Therefore, studying and understanding AMR in swine has global relevance. AMR  
34 research has received increased attention in recent years. However, we are still building  
35 our understanding of genetic variation within a complex gut microbiome system that  
36 impacts AMR and MDR. In order to evaluate the gut resistome, we evaluated genetic  
37 variation before, during, and after antibiotic treatments. We studied three treatment  
38 groups: non-antibiotic controls (C), chlortetracycline (CTC) treated, and tiamulin (TMU)  
39 treated. We collected fecal samples from each group and performed metagenomic  
40 sequencing for a longitudinal analysis of genetic variation and functions. **Results:** We  
41 generated 772,688,506 reads and 81 metagenome assembled genomes (MAGs).  
42 Interestingly, we identified a subset of 11 MAGs with sustained detection and high  
43 sustained entropy (SDHSE). Entropy described genetic variation throughout the MAG.  
44 Our SDHSE MAGs were considered MDR as they were identified prior to, throughout,  
45 and after CTC and TMU treatments as well as in the C piglets. SDHSE MAGs were  
46 especially concerning as they harbored relatively high variation. Consistently high  
47 variation indicated that these microbial populations may contain hypermutable elements  
48 which has been associated with increased chance of AMR and MDR acquisition. Our  
49 SDHSE MAGs demonstrated that MDR organisms (MDRO) are present in swine, and  
50 likely additional hosts contributing to global AMR. Altogether, our study provides  
51 comprehensive genetic support of MDR populations within the gut microbiome of swine.

## 52 **Introduction**

53

54 Antimicrobial resistance (AMR) is a ubiquitous threat around the world, estimating to be  
55 the third cause of global human deaths<sup>1</sup>. Antimicrobial resistance was estimated to be  
56 associated with 4.95 million deaths globally in 2019<sup>1</sup> and 2.8 million illnesses annually in  
57 the US alone<sup>2</sup>. AMR has also burdened medical systems and economies, and scientists  
58 see this as a sustained trend expecting \$100-210 global losses due to AMR by 2050<sup>3-5</sup>.  
59 The burden and repercussions of AMR are a one world health concern as antibiotics are  
60 utilized for animals in addition to humans<sup>6</sup>. AMR describes bacteria containing genetic  
61 components which allow them to survive through antimicrobial treatment. Particular  
62 concern arises when bacteria exhibit resistance to multiple drugs<sup>7,8</sup>. These multidrug  
63 resistant (MDR) organisms (MDRO) can persist, at times, beyond all medicinally utilized  
64 antibiotics<sup>7-9</sup>. Moreover, multidrug resistant bacteria can spread through individuals, and  
65 between humans and animals, increasing the prevalence of AMR<sup>10</sup>. With the global  
66 burden of AMR, we need an enhanced understanding of AMR to combat infections  
67 caused by MDRO.

68

69 Animal agriculture has been identified as the largest antibiotic consumer<sup>11</sup>. Antibiotics  
70 have been used in agricultural animals, much like humans, to treat bacterial infections,  
71 but antibiotics are also for growth promotion in agriculture<sup>12</sup>. Swine production was  
72 estimated to be the current largest agricultural animal antibiotic-use sector in 2017<sup>11,13</sup>.  
73 Moreover, antimicrobial resistance rates are rising in the swine industry as the  
74 proportion of antibiotics, with resistance higher than 50%, increased in the swine  
75 industry from 0.13 to 0.34 from 2000 to 2018<sup>14</sup>. Global surveys<sup>15-19</sup> and smaller-scale  
76 studies<sup>20-26</sup> have in-large identified high consumption of tetracycline antibiotics in the  
77 past two decades in animal agriculture and swine. Tetracycline was estimated to  
78 account for 43% of antibiotic usage in agricultural animals from 2015 to 2017<sup>19</sup>.  
79 Unfortunately, tetracycline antibiotics are not exclusively utilized in animals. For  
80 example, chlortetracycline is used in both swine and humans<sup>27,28</sup>. With continued use of  
81 antimicrobial drugs, especially when utilizing the same treatments in humans and

82 animals, and increasing resistance to antibiotics, AMR is a global concern to agriculture  
83 and humanity alike.

84

85 In monogastric animals, including pigs and humans, the gut microbiota has been  
86 identified as an AMR reservoir<sup>29,30</sup>. The gut microbiome has been recognized as a  
87 diverse environment in terms of antimicrobial resistant genes<sup>31,32</sup>. With oral antibiotic  
88 use, the gut has been demonstrated to increase in resistant bacteria<sup>33</sup>. Antibiotic  
89 treatments decrease the abundance of susceptible bacteria which allows resistant  
90 bacteria more resources, such as nutrients and space, to increase in abundance<sup>34</sup>.  
91 While the work in AMR is accumulating at a fast pace, we still have limited  
92 understanding on how genetic variations among the microbial populations contribute to  
93 the resistome.

94

95 Antibiotic use has been associated with bacteria containing increased genetic variation  
96 and so-called hypermutable bacteria<sup>35,36</sup>. Antibiotic usage selects for bacteria with  
97 genetic variation, or those with relatively high mutation rates termed hypermutable  
98 bacteria<sup>35</sup>. As bacteria develop variation, this leads to an increased chance of  
99 developing resistance<sup>35,36</sup>. Therefore with subsequent antimicrobial treatments, we are  
100 continually selecting for hypermutable populations harboring increased variation in turn  
101 having more opportunities for further AMR acquisition and MDR<sup>35,36</sup>. This can lead to  
102 MDR bacteria with high mutation rates to evade future antimicrobial treatments.  
103 However, studies related to the understanding of cumulative genetic variation across  
104 AMR genes in MDR bacteria in response to antibiotic supplementation (in vivo) among  
105 piglets are lacking. In studying microbial variation in these circumstances, we can  
106 further evaluate the risk of and potential treatments for MDR bacteria.

107

108 Clearly, we need a deeper understanding of antimicrobial resistance and MDR to  
109 enhance our approach to AMR. Here, we studied gut microbiota through two distinct  
110 antibiotic treatments (in-feed chlortetracycline [CTC] and in-feed tiamulin [TMU]) in  
111 addition to a non-antibiotic control (C). We utilized swine, with tetracycline and  
112 pleuromutilin class antibiotics, to provide an *in vivo* evaluation of a comparatively high

113 and low utilized antibiotic classes<sup>11,13</sup>, in the global swine industry<sup>15-26</sup>. As mentioned  
114 previously, tetracycline antibiotics accounted for 43% of antibiotic usage in animal  
115 agriculture during 2015-2017 whereas pleuromutilin only accounted for 3%<sup>19</sup>. For our  
116 study, we performed metagenomic sequencing to obtain genes for functional analysis.  
117 Following our subsequent genome assembly and manual genome refining, we identified  
118 a subset of 11 metagenome-assembled genomes (MAGs) with high genetic variation  
119 prior to and throughout both antibiotic treatments and in control swine. We also  
120 confirmed consistent detection of the 11 MAGs and termed these MAGs: sustained  
121 detection and high sustained entropy (SDHSE) MAGs. Our SDHSE MAGs are of  
122 concern as they contained genetic variation and demonstrated MDR to both CTC and  
123 TMU. Moreover, we identified 22 distinct AMR genes in our SDHSE MAGs. Altogether,  
124 we provide evidence of MDR bacteria present in swine with concerning high levels of  
125 genetic variation in 11 distinct microbial populations. Our research transcends global  
126 health with insights into antimicrobial resistance, and especially MDR, from a major  
127 contributor to global AMR.

128

## 129 **Materials and Methods**

130

### 131 ***Experimental design***

132 The swine study was performed as previously described (Figure 1A-C)<sup>37-39</sup>. Swine  
133 (genetic line L337x1050, PIC, Hendersonville, TN) were housed in a commercial  
134 research nursery facility. Diets were fed with formulations as previously described<sup>40</sup>. All  
135 pigs were housed in one room with an enclosed, environmentally controlled, and  
136 mechanical ventilation system. Pens contained slatted floors with deep manure pits.  
137 Feed and water were provided *ad libitum* per pen with a six-hole stainless steel self-  
138 feeder (refilled via a robotic system) and pan waterer (Supplementary Table S1). This  
139 study utilized 648 pigs randomly distributed into 24 pens (27 pigs per pen), while  
140 working to minimize differences in average pen weight during distribution. Three  
141 treatments were administered, according to average pen weight, 7 days after weaning  
142 at 21 days of age, for a total of 14 days, each across 8 pens: control (no antibiotic; C),  
143 in-feed chlortetracycline (CTC; 22 mg/kg body weight; CTC-hydrochloride, Elanco

144 Animal Health, Indianapolis, IN), and in-feed tiamulin (TMU; 5 mg/kg body weight;  
145 Denagard®, Elanco, Animal Health, Indianapolis, IN).

146  
147 Swine were managed according to protocol #4033 with Kansas State University  
148 Institutional Animal Care and Use Committee (IACUC). The authors also confirmed that  
149 all methods were performed in accordance with relevant guidelines and regulations<sup>41</sup>,  
150 and we affirmed that all methods were approved by Kansas State University.

151

### 152 ***Sample Collection***

153 For this study, we considered each pen as an experimental unit, and there were eight  
154 pens per antibiotic treatment (Figure 1A-C). Fecal collection occurred every seven days,  
155 starting on the day of introduction to the pens (Supplementary Table S1). Fecal samples  
156 were collected via gentle rectal massage from five randomly selected pigs per two  
157 random pens per treatment, and each fecal sample was stored in individual sterile  
158 plastic bags (Whirl-Pak® bags, Nasco, Ft. Atkinson, WI) and kept on ice during  
159 transportation. Processing occurred within 24 hours of collection, with intermittent  
160 storage at 4°C, at the Pre-harvest Food Safety laboratory, College of Veterinary  
161 Medicine, Kansas State University. Laboratory personnel were blinded to the  
162 treatments.

163

### 164 ***DNA extraction***

165 Fecal samples were stored at -80°C until DNA extraction. For each pen and time-point,  
166 the five fecal samples were pooled for DNA extraction (Figure 1A-C; n=30 samples [5  
167 time-points\*2 pens per treatment/time-point\*3 treatments]). Total genomic DNA from  
168 fecal samples was extracted utilizing the DNeasy PowerSoil Pro Kits (QIAGEN Inc.;  
169 Valencia, CA), following the manufacturer protocols. We then quantified the extracted  
170 genomic DNA with a Nanodrop and Qubit™ (dsDNA BR Assay Kit [Thermo Fisher;  
171 Waltham, MA]) for DNA quality and concentration. Final storage of extracted DNA was  
172 at -80°C until library preparation and sequencing.

173

### 174 ***Metagenomic sequencing and 'omics workflow***

175 Library preparation was performed on 30 samples with Nextera DNA Flex (Illumina, Inc.;  
176 San Diego, CA) (Figure 1B; Supplementary Table S1). A TapeStation 4200 (Agilent;  
177 Santa Clara, CA) was employed to visualize libraries followed by size-selected via a  
178 BluePippin (Sage Science; Beverly, MA). The final library pool of 30 samples was  
179 quantified with the Kapa Biosystems (Roche Sequencing; Pleasanton, CA) qPCR  
180 protocol, and sequenced on an Illumina NovaSeq S1 chip (Illumina, Inc.; San Diego,  
181 CA) with a 2 x 150 bp paired-end sequencing strategy.

182  
183 We performed a bioinformatics workflow using anvi'o v.7.1 (<https://anvio.org/install/>;  
184 'anvi-run-workflow' program)<sup>42,43</sup>. The workflow utilized Snakemake<sup>44</sup> to perform multiple  
185 tasks: short-read quality filtering, assembly, gene calling, functional annotation, hidden  
186 Markov model search, metagenomic read-recruitment and binning<sup>45</sup>. Briefly, we  
187 processed sequencing reads using anvi'o's 'iu-filer-quality-minoche' program removing  
188 low-quality reads following criteria described in Minoche *et al.*<sup>46</sup>. We termed the  
189 resulting quality-control reads "metagenome" per sample. We co-assembled quality-  
190 control short reads from metagenomes into longer contiguous sequences (contigs)  
191 according to no-treatment (prior to treatment/after) and treatment groups (C, CTC,  
192 TMU). We utilized MEGAHIT v1.2.9<sup>42,47</sup> for co-assembly. The following anvi'o methods  
193 were then performed to further process contigs: (1) 'anvi-gen-contigs-database' to  
194 compute *k*-mer frequencies and identify open reading frames (ORFs) using Prodigal  
195 v2.6.3<sup>42,48</sup>; (2) 'anvi-run-hmms' to annotate bacterial and archaeal single-copy, core  
196 genes using HMMER v.3.2.1<sup>42,49</sup>; (3) 'anvi-run-ncbi-cogs' to annotate ORFs with NCBI's  
197 Clusters of Orthologous Groups (COGs; <https://www.ncbi.nlm.nih.gov/research/cog>)<sup>50</sup>;  
198 and (4) 'anvi-run-kegg-kofams' to annotate ORFs from KOfam HMM databases of  
199 KEGG orthologs (<https://www.genome.jp/kegg/>)<sup>51</sup>.

200  
201 We mapped all metagenomes' short reads to contigs with Bowtie2 v2.3.5<sup>52</sup>. We  
202 converted mappings with samtools v1.9<sup>42,53,54</sup> into BAM files. We profiled BAM mapping  
203 files ('anvi-profile')<sup>42</sup> with a minimum length of 1,000 bp. We then combined profiles with  
204 'anvi-merge' into a single anvi'o profile. Next, we used CONCOCT v1.1.0<sup>55</sup> to group  
205 contigs into bins. We manually refined bins with 'anvi-refine' using bin tetranucleotide

206 frequency and coverage across sample metagenomes<sup>42,56,57</sup>. After manual refining, we  
207 labeled bins that had  $\geq 70\%$  completion and  $< 10\%$  redundancy (both based on single-  
208 copy core gene annotation<sup>58</sup>) as metagenome-assembled genomes (MAGs). We  
209 analyzed MAG occurrences according to the “detection” metric. We determined single-  
210 nucleotide variants (SNVs) on all MAGs after read mapping with ‘anvi-gen-variability-  
211 profile’ and ‘--quince-mode’<sup>42</sup>. We used anvi’o’s DESMAN v2.1.1 to analyze SNVs to  
212 determine the number and distribution of subpopulations in the MAGs<sup>59</sup>. We accounted  
213 for non-specific mapping by removing any MAG subpopulations that made up less than  
214 1% of the entire population and were explained by a singular MAG.

215

### 216 ***Data analyses***

217 We used RStudio v1.3.1093<sup>60</sup> to visualize MAGs detection and entropy patterns in  
218 RStudio (<https://www.rstudio.com/products/rstudio/>) using: pheatmap (pretty heatmaps)  
219 v1.0.12<sup>61</sup>, ggplot2 v3.3.5 (<https://ggplot2.tidyverse.org/>)<sup>62</sup>, forcats v0.5.1  
220 (<https://forcats.tidyverse.org/>)<sup>63</sup>, dplyr v1.0.8 (<https://dplyr.tidyverse.org/>)<sup>64</sup>, and ggpubr  
221 v0.4.0 (<https://CRAN.R-project.org/package=ggpubr>)<sup>65</sup>. We generated SNVs counts  
222 according to individual sample with anvi’o, anvi-summarize, and MAG entropies<sup>66</sup> were  
223 generated with anvi’o’s anvi-gen-variability-profile<sup>42,57</sup>. Individual MAG entropy files and  
224 individual MAG statistical analysis files were combined respectively in RStudio with:  
225 tidyverse 1.3.1 (<https://cran.r-project.org/web/packages/tidyverse/citation.html>)<sup>67</sup> and  
226 1.4.0 (<https://stringr.tidyverse.org/>)<sup>68</sup>. We performed Welch two sample T-test<sup>69</sup>  
227 statistical analysis on detection and entropy according to pre-treatment versus post-  
228 treatment and treatment groups. We used anvi’o COG annotations, as described above,  
229 for metabolic function analyses<sup>42</sup>. Our final figures were edited in Inkscape v1.2.1<sup>70</sup>.

230

### 231 ***Data availability***

232 We uploaded our metagenome raw sequencing data to the SRA under NCBI BioProject  
233 PRJNA899060. All other analyzed data, in the form of databases and fasta files, and  
234 bioinformatic scripts are accessible at figshare  
235 (<https://doi.org/10.6084/m9.figshare.21548445.v1>).

236



## 237 **Results and Discussion**

238  
239 Antimicrobial resistance (AMR), and especially multidrug resistance (MDR), are a global  
240 concern. Animal agriculture has been identified as the top consumer of antibiotics with  
241 the swine industry consuming the most of any agricultural sector<sup>11,13</sup>. In order to better  
242 understand AMR and MDR dynamics of the swine gut microbiome, we collected  
243 samples prior to, during and after antibiotic treatment. We utilized three distinct  
244 treatment groups: chlortetracycline, tiamulin, and non-antibiotic control. These  
245 antibiotics were utilized to allow analysis of distinctly utilized microbial classes across  
246 swine. Interestingly, we identified 11 distinct bacterial populations with similar detection  
247 levels pre- and post-treatment and between treatments. These bacteria harbored high  
248 genetic variation. The 11 microbial populations, assembled from our metagenomic data,  
249 were termed sustained detection and high sustained entropy (SDHSE) metagenome-  
250 assembled genomes (MAGs). Already exhibiting MDR, high variation in our resolved  
251 SDHSE MAGs could result in enhanced multidrug resistance. We further identified 22  
252 unique AMR genes with varying detection in SDHSE MAGs. Altogether, we detailed  
253 AMR of swine microbiota with genetic support of existing MDR prior to antibiotic  
254 treatments and sustained variation throughout treatments. Our study advances AMR  
255 and MDR research by providing reflection on antibiotic and resistome association with  
256 animal agriculture, and potentially additional monogastric hosts.

257

### 258 ***Resolved identify of gut metagenome-assembled genomes***

259 We assembled and analyzed high resolution metagenome-assembled genomes  
260 (MAGs) to postulate functional distinctions between gut microbiota before and after  
261 antibiotic treatment. Each MAG represents a “microbial population.” We described a  
262 microbial population as an assemblage of coexisting microbial genomes in an  
263 environment that are similar enough to map metagenomic reads to the same reference  
264 genomes<sup>71</sup>. Metagenomic sequencing on an Illumina NovaSeq produced 772,688,506  
265 paired-end reads from 30 fecal samples (Figure 1B; Supplementary Table S2). After  
266 quality filtering, 741,143,268 paired reads (96%) were utilized in contig co-assembly.  
267 We generated 330,769 contigs from assembly which described 1,018,536,193

268 nucleotides and 1,270,711 genes. We performed contig binning to create 369 bins, and  
269 after automatic and manual refinement we resolved 205 MAGs (Supplementary Table  
270 S3). To ensure high quality MAGs in our analysis, we performed downstream analysis  
271 with MAGs greater than 2M nucleotides (n=81), as these would more accurately  
272 represent bacterial genomes<sup>72</sup>. Of these 81 MAGs, each MAG, contained  $360 \pm 232$   
273 contigs and an N50 value of  $18,345 \pm 16,569$  nucleotides. MAG GC contents ranged  
274 from 26% to 62%. Moreover, the average MAG size was 2,424,923 nucleotides. The  
275 MAGs were assigned to 6 bacterial phyla (*Actinobacteriota*, n=3; *Bacteroidota*, n=37;  
276 *Firmicutes*, n=38; *Planctomycetota*, n=1; *Proteobacteria*, n=1; and *Verrucomicrobiota*,  
277 n=1) with 96% of the MAGs resolved to 48 distinct genera.

278  
279 We mapped each sample's metagenomic reads (i.e. metagenome) to the 81 MAGs to  
280 determine detection throughout the study (Figure 2 and Supplementary Table S4). We  
281 confirmed detection of all 81 MAGs and determined general differential detection  
282 patterns according to detection clustering. The top branches broadly depict MAGs  
283 detected in the pre-treatment period. Comparatively, the middle clusters were sparsely  
284 detected. Finally, the bottom clusters were, in general, detected relatively high,  
285 compared to previous clusters, throughout the experiment regardless of pre- or post-  
286 treatment or treatment group. Altogether, our detection analysis suggested that  
287 association of microbial populations with swine hosts was far more complex than just  
288 what bacteria were affected by the use of antibiotics.

289  
290 Previous studies suggested environmental pressures, such as antibiotic administration,  
291 increased genetic variation in microorganisms<sup>73,74</sup>. The genetic variation in bacteria  
292 results from single nucleotide polymorphisms (SNPs), and could lead to generation of  
293 novel bacterial strains<sup>73</sup>. Studies further demonstrated that bacteria often used  
294 mutations as a mechanism for stress response, which is termed as stress-induced  
295 mutagenesis<sup>75</sup>. Since one of the mechanisms for the diversification and adaptation of  
296 the genomes operates at the single nucleotide level, we proceeded to resolve a more  
297 complete understanding of the environmental forces that affect adaptive strategies of  
298 our resolved MAGs to survive in the environment they resided in. Therefore, while our

299 MAGs were detected throughout the study, we were particularly interested in how MAG  
300 variants were changing according to treatment. Our bioinformatic analysis generated  
301 single nucleotide variants (SNVs) according to sample (Figure 2). We noticed relatively  
302 more SNVs associated with the post-treatment samples, which suggested that our  
303 resolved MAGs might respond to the antibiotic induced environmental pressure leading  
304 to the generation of new strains<sup>73</sup>. In light of this discovery, we proceeded to evaluate  
305 which MAGs were consistently high variation while maintaining detection even with  
306 different antibiotic treatments. These MAGs could potentially evade antimicrobial  
307 treatment with a multitude of variants, as demonstrated through sustained detection.  
308 Therefore, we next evaluated entropy throughout all 81 MAGs.

309

### 310 ***MAGs harboring high genetic variation persisted through antimicrobial treatment***

311 We performed single nucleotide variant (SNV) analysis to calculate entropy on our 81  
312 MAGs to investigate genetic variation due antibiotic induced environmental pressure  
313 (Supplementary Table S5). Entropy describes nucleotide ratios for a given position, and  
314 entropy is measured from 0 (no variation; A=0, T=0, G=0, C=1) to 1 (complete variation;  
315 A=0.25, T=0.25, G=0.25, C=0.25)<sup>76</sup>. We performed statistical analysis to determine  
316 which MAGs held high sustained variation in the form of entropy and sustained  
317 detection (Supplementary Table S6). We discovered 31 MAGs with no statistical  
318 difference in entropy and detection (Supplementary Table S6). These MAGs  
319 represented microbial populations that were detected consistently regardless of  
320 antibiotic treatment. We further narrowed our selection to 11 MAGs with the relatively  
321 highest (33%) variation (Supplementary Table S6) because we were interested in  
322 MAGs harboring high variation, with potential multidrug evasion. Previous publications  
323 demonstrated the use of relative entropy analysis versus discrete entropy thresholds<sup>77-</sup>  
324 <sup>79</sup>. These 11 MAGs were termed sustained detection and high sustained entropy  
325 (SDHSE) MAGs (Figure 3; Table 1). Of these SDHSE MAGs, 5 (45%) were assigned to  
326 the gram negative *Bacteroidota* (also known as *Bacteroidetes*)<sup>80</sup> phylum, while 6 (55%)  
327 were annotated to gram positive *Firmicutes*. While members of both phyla have been  
328 associated with resistance to CTC and TMU, we identified only 2 (*Prevotella*<sup>81-83</sup> and  
329 *Ruminococcus*<sup>84-86</sup>) of 9 genera associated with CTC resistance and 0 with TMU. Of our

330 11 SDHSE MAGs, 8 (73%) MAGs were annotated to 8 distinct species. Akin to the  
331 genus level, we provided novel associations of bacterial species, within the SDHSE  
332 MAG populations, exhibiting MDR. The finding indicated there are likely additional  
333 genera and species, with CTC and TMU resistance, then are currently known. Still, we  
334 wanted to investigate how the genetic variation of our SDHSE MAGs was related to  
335 AMR and MDR.

336  
337 Our SDHSE MAGs satisfied three important criteria - 1) consistent detection; 2)  
338 consistent high coverage of MAGs in the metagenomes; 3) consistent high variation of  
339 the MAGs in the metagenomes. Consistent detection demonstrated MDR, at least  
340 encompassing resistance to CTC and TMU, of the microbial populations. Consistent  
341 high coverage of the MAGs removed biases of identifying false variations among  
342 metagenomes due to coverage differences. Finally, previous publications have  
343 described how bacteria harboring variation are a concern for antimicrobial  
344 resistance<sup>35,87,88</sup>. When a microbial population contains a relatively high number of  
345 SNVs or contains a highly variable genetic background, the population contains genetic  
346 variation which may allow bacteria to persist even with antibiotic treatments. Here we  
347 demonstrated that our 11 SDHSE MAGs showed similar detection prior to and after  
348 distinct antibiotic treatments (CTC and TMU). The specific variants harbored in these  
349 MAGs are of particular interest to antimicrobial resistance (AMR) studies, thus, we  
350 surmised that the broad variation within these SDHSE MAGs likely contributed to the  
351 bacteria's adaptive ability to survive antibiotic induced environments. Moreover,  
352 harboring continued high variation even after antibiotic treatment suggested many  
353 variants were able to persist during and after CTC and TMU treatment<sup>35,87,88</sup>. Previous  
354 studies highlight the role of antibiotic selection for populations with higher mutations,  
355 called hypermutable bacteria, which leads to high genetic variation in subsequent  
356 generations<sup>35,36</sup>. Our SDHSE MAGs were concerning as they contained high variation  
357 prior to antibiotic treatment and were able to remain present in the gut microbiome  
358 following antimicrobial treatment. Additional research is crucial to determine the  
359 presence of MDR organisms (MDRO) in additional hosts, regardless of previous  
360 antibiotic treatment. Our results suggested that there are likely numerous MDRO

361 already present in hosts. Further antimicrobial treatments could continually be selecting  
362 for further MDR and hypermutable bacteria across all hosts, including across swine,  
363 monogastric and additional hosts. Hypermutable bacteria, including our SDHSE MAGs  
364 harboring numerous variants, are a concern to AMR with their MDR potential<sup>35,36</sup>.

365

366 We hypothesized that out 11 SDHSE MAGs likely contained AMR genes contributing to  
367 their continued detection. Therefore, we evaluated the MAGs for AMR genes within our  
368 functional potential annotations.

369

### 370 ***Abundance of antimicrobial resistance (AMR) genes associated with sustained*** 371 ***detection and high sustained entropy (SDHSE) MAGs***

372 We hypothesized that genetic components associated with AMR supported the ability  
373 for SDHSE MAGs to prevail regardless of CTC and TMU use. We used COG  
374 annotations to investigate genetic functions for our 11 SDHSE MAGs, and we obtained  
375 a total of 21,025 COG annotations (average 1,911 per MAG). We observed numerous  
376 AMR genes within the high entropy contigs among the SDHSE MAGs (Supplementary  
377 Table S7). Within the COG annotations, we identified 19 unique gene annotations that  
378 coded for 18 distinct proteins or protein complexes related to AMR with an additional  
379 three genes (two complexes: YadH/YadG and RhaT) for drug efflux (Figure 4, Table 2,  
380 and Supplementary Table S8)<sup>89-126</sup>. We identified genes associated with six different  
381 drug efflux pump superfamilies (ATP-binding cassette [ABC], multidrug and toxic  
382 compound extrusion [MATE], drug/metabolite transporter [DMT], major facilitator [MFS],  
383 resistance-nodulation-division [RND], and small multidrug resistance [SMR]) alongside  
384 genes coding for: antimicrobial peptides (AMP),  $\beta$ -lactamases,  $\beta$ -lactamase regulators,  
385 and penicillin binding protein (PBP) relatives. Interestingly, of the 11 SDHSE MAGs, the  
386 gram negative MAGs (n=5) were, on average, annotated with 13 (57%) of the 22 genes,  
387 whereas the gram positive MAGs (n=6) were annotated on average with 12 (52%)  
388 genes. This agrees with previous literature indicating AMR is more often associated with  
389 gram negative bacteria relative to gram positive bacteria<sup>127</sup>. Still, both gram negative  
390 and gram positive bacteria cause significant illnesses and mortalities globally<sup>127-129</sup>.  
391 Given the risk MDR bacteria, including our SDHSE MAGs, pose to society, we further

392 investigated individual resistance genes and proteins to build the knowledge  
393 surrounding AMR and MDR.

394  
395 We noticed all SDHSE MAGs contained a variety of drug efflux pump and other (non-  
396 efflux pump) genes. Looking further into suspected resistance to antibiotics, based on  
397 AMR gene annotations, we discovered all SDHSE MAGs harbored AMR genes  
398 associated with 5 distinct antibiotic classes (Table 2)<sup>89-115</sup>. Tetracycline resistance,  
399 including resistance to CTC, is suspected across all SDHSE MAGs due to shared  
400 presence of *ftsI* and *mepA*, alongside *mdlB*, *norB*, *tetA*, *acrA-acrB-toIC*, *emrE*, and  
401 *tetD*<sup>89-115</sup>. The shared presence of multiple AMR genes could explain the consistent  
402 identification of these MAGs, regardless of antibiotic use. These bacteria could have  
403 repressed effects of the antibiotics as a result of these, and likely other, AMR genes. As  
404 expected, our gram negative MAGs contained, on average, a broader antibiotic class  
405 resistance (n=8.8) compared to gram positive MAGs (n=7.0)<sup>127</sup>. The physical membrane  
406 distinctions between gram positive and gram negative bacteria have resulted in greater  
407 antimicrobial resistance in gram negative bacteria<sup>127</sup>. Overall, we showed that all  
408 SDHSE MAGs demonstrated multidrug resistance potential which likely contributed to  
409 their continual presence even after antibiotic treatment.

410  
411 We identified tripartite efflux pumps solely in gram negative MAGs. We identified the  
412 RND tripartite AcrAB-TolC complex genes in nearly of all our SDHSE gram negative  
413 genomes; only SDHSE-03 lacked AcrAB-TolC identification. RND pumps facilitate efflux  
414 across the outer membrane<sup>124</sup>. Gram positive bacteria lack this outer membrane which  
415 coincided with the absence of *acrA-acrB-toIC* annotation in our gram positive MAGs<sup>124</sup>.  
416 Moreover, since the majority of efflux pumps only facilitate efflux across the first  
417 membrane, RND pumps such as *acrA-acrB-toIC* have been described as broader and  
418 supports association of *acrA-acrB-toIC* with CTC and TMU resistance (Supplementary  
419 Table S8)<sup>89,109,124</sup>. A similar tripartite structure and efflux action have been described in  
420 the MFS efflux pump EmrAB-TolC, again in gram negative bacteria<sup>124</sup>. Although,  
421 EmrAB-TolC, to the best of our knowledge, has not been associated with CTC or TMU  
422 resistance. In our study, the identification of EmrAB-TolC in the CTC and TMU

423 treatments suggested that EmrAB-TolC could have roles in CTC and TMU resistance.  
424 Further research is crucial to discover the range and action of tripartite efflux pumps in  
425 resistance and especially MDR.

426  
427 We identified six of seven distinct efflux superfamilies, but we did not identify any  
428 proteobacterial antimicrobial compound efflux (PACE) annotations<sup>130</sup>. Although PACE  
429 has been demonstrated as prevalent in gram negative bacteria, previous literature has  
430 lacked identification in gram negative *Bacteroidota*, while PACE has been identified in  
431 gram positive *Firmicutes*<sup>131</sup>. PACE, the newest antibiotic class, was first described in  
432 2015, with the second newest antibiotic class having been found in 2000<sup>132</sup>. Therefore,  
433 the breadth of knowledge surrounding PACE is growing and our MAGs could contain  
434 PACE efflux pump genes which have not been annotated within the COG database to  
435 date.

436  
437 Beyond drug efflux pumps, we also identified genes coding for additional AMR proteins.  
438 As expected, we did not associate CTC or TMU resistance with  $\beta$ -lactamase or  
439 penicillin binding protein (PBP) related genes (Supplementary Table S8).  $\beta$ -lactamase  
440 inactivates  $\beta$ -lactam antibiotics, including penicillins, carbapenems, and  
441 cephalosporins<sup>133</sup>. We surmised that genes coding for these AMR proteins identified in  
442 our SDHSE MAGs have not previously been associated with CTC and TMU resistance  
443 due to their biochemical action, limiting their range of resistance<sup>133</sup>.

444  
445 We did not identify any genes, outside of drug efflux genes, with suspected  
446 pleuromutilin (TMU) resistance. The only gene with suspected TMU resistance was the  
447 RND pump AcrAB-TolC<sup>113</sup>, which has also been associated with resistance of 5 other  
448 antibiotic classes. Only 36% of SDHSE MAGs contained genes with resistance to  
449 pleuromutilin antibiotics like TMU<sup>109</sup>. There are likely additional genes beyond the COG  
450 annotations we evaluated, and perhaps additional resistance which has yet to be  
451 discovered<sup>134</sup>. Additionally, we found that the majority of proteins (56%) associated with  
452 our genes had no previous support for resistance to CTC or TMU. Together, these  
453 results indicated a sizable knowledge gap in understanding the implications of strain

454 level genetic variations among bacterial populations. Our SDHSE MAGs are likely  
455 harboring MDR to not only CTC and TMU, but other drugs, with genetic variations  
456 hindering targeted therapeutics<sup>135</sup>. While there has been a call for shifting our antibiotic  
457 usage to narrow or even strain-specific antibiotics to limit further AMR with application of  
458 broad antibiotics<sup>136</sup>, bacterial populations with high genetic variation could minimize the  
459 success of such therapies<sup>35</sup>. Clearly bacterial populations, such as SDHSE bacteria,  
460 with high genetic variation are concerning as they demonstrate increased AMR and  
461 threaten further AMR through targeted antimicrobials<sup>35</sup>. Future research needs to  
462 investigate similar SDHSE populations to determine their prevalence and risk they pose  
463 to global health.

464

## 465 **Conclusions**

466

467 In order to investigate genetic variations pertaining MDR and AMR, we evaluated the  
468 gut microbiome for population dynamics before, during and after antimicrobial  
469 treatment. Our research is critical to understanding the implications of AMR on global  
470 health as we evaluated resistance in a sector dominating antibiotic use: swine  
471 production<sup>11,13</sup>. We demonstrated evidence of MDR bacterial populations present prior  
472 to antibiotic administration through 11 distinct bacterial populations we termed sustained  
473 detection and high sustained entropy (SDHSE) MAGs.

474

475 Within these MAGs, we indicated novel CTC and TMU resistance association with their  
476 taxonomic classifications at the genus and species levels. As work continues to  
477 discover gut-associated bacteria, we should evaluate their AMR characteristics to  
478 combat further resistance. Further highlighting the need for heightened AMR research,  
479 we found that approximately a third of our SDHSE MAGs contained annotated genes  
480 associated with TMU resistance. Although given the consistent identification of these  
481 MAGs during TMU treatment, there must be TMU resistance genes within the SDHSE  
482 genomes resulting in TMU resistance. Our SDHSE microbial populations harbored  
483 variation and AMR genes prior to antimicrobial treatment. We demonstrated that,  
484 although antimicrobial resistance is known to select for resistance<sup>35,87,88</sup>, resistant



485 populations are currently present in the swine gut, indicating there are likely similar  
486 situations across additional hosts. While the number of antimicrobial resistance studies  
487 published has increased substantially since 2010<sup>137</sup>, the scientific community still has  
488 numerous topics to evaluate to better target AMR and MDR, all while under the  
489 pressure of rising antimicrobial resistance concerns<sup>138</sup>.

490 **Acknowledgements**

491  
492 Authors would like to thank the National Pork Board for funding part of this proposal (19-  
493 028). This work was supported in part by the USDA National Institute of Food and  
494 Agriculture, Hatch/Multistate Project 1014385. Our team is extremely grateful to the  
495 large number of individuals and organizations which assisted us in performing this  
496 research. We thank the University of Kansas Medical Center Genome Sequencing  
497 Facility for their expertise and assistance in sequencing including: Clark Bloomer, Dr.  
498 Veronica Cloud, Rosanne Skinner, and Yafen Niu. We greatly appreciate assistance  
499 from the following sources: Kansas State University Interdepartmental Genetics  
500 Program (fellowship for Brandi Feehan), Global Food Systems Seed Grant Program,  
501 Kansas Intellectual and Developmental Disabilities Research Center (NIH U54 HD  
502 090216), the Molecular Regulation of Cell Development and Differentiation – COBRE  
503 (P30 GM122731-03) - the NIH S10 High-End Instrumentation Grant (NIH  
504 S10OD021743) and the Frontiers CTSA grant (UL1TR002366) at the University of  
505 Kansas Medical Center, Kansas City, KS 66160.

506

507 **Author Contributions**

508  
509 R. G. A, T. G. N, and M. D. T designed and executed the study at the commercial  
510 nursery facility. Sample collection was completed by R.G.A. R.G.A. performed DNA  
511 extraction while B.F and K.R. fulfilled Nanodrop and Qubit quality analysis. B.F. and  
512 Q.R., S.T.M.L. performed anvi'o bioinformatic analyses. B.F. and S.T.M.L. attributed  
513 biological relevance, wrote the manuscript, prepared figures, and supplementary files.  
514 B.F. and S.T.M.L. performed major manuscript and figure refinement while remaining  
515 authors contributed to lighter refinement. All authors read, contributed to manuscript  
516 revision, and approved the submitted version.

517

518 **Competing Interests**

519

520 The authors declare no competing interests.

521

522 **Materials & Correspondence**  
523

524 Requests for materials and correspondence should be addressed to Dr. Sonny T M Lee  
525 at leet1@ksu.edu and Dr. Raghavendra G. Amachawadi at agraghav@vet.ksu.edu.

526 **References**

- 527
- 528 1. Murray, C. J. L. *et al.* Global burden of bacterial antimicrobial resistance in 2019: a  
529 systematic analysis. *Lancet* **399**, 629–655 (2022).
  - 530 2. Centers for Disease Control and Prevention (U.S.). Antibiotic resistance threats in the  
531 United States. *US Department of Health and Human Services* (2019).
  - 532 3. O'Neill, J. *Antimicrobial resistance: tackling a crisis for the health and wealth of nations*.  
533 (Review on Antimicrobial Resistance, 2014).
  - 534 4. Jonas *et al.* Drug-resistant infections: a threat to our economic future (Vol. 2) : final report.  
535 *World Bank* [https://documents.worldbank.org/en/publication/documents-](https://documents.worldbank.org/en/publication/documents-reports/documentdetail/323311493396993758/final-re-)  
536 [reports/documentdetail/323311493396993758/final-re-](https://documents.worldbank.org/en/publication/documents-reports/documentdetail/323311493396993758/final-re-) (2017).
  - 537 5. Dadgostar, P. Antimicrobial Resistance: Implications and Costs. *Infect. Drug Resist.* **12**,  
538 3903–3910 (2019).
  - 539 6. Aslam, B. *et al.* Antibiotic Resistance: One Health One World Outlook. *Front. Cell. Infect.*  
540 *Microbiol.* **11**, 771510 (2021).
  - 541 7. Tanwar, J., Das, S., Fatima, Z. & Hameed, S. Multidrug resistance: an emerging crisis.  
542 *Interdiscip. Perspect. Infect. Dis.* **2014**, 541340 (2014).
  - 543 8. Nikaido, H. Multidrug resistance in bacteria. *Annu. Rev. Biochem.* **78**, 119–146 (2009).
  - 544 9. Livermore, D. M. The need for new antibiotics. *Clin. Microbiol. Infect.* **10 Suppl 4**, 1–9  
545 (2004).
  - 546 10. Antimicrobial resistance. [https://www.who.int/news-room/fact-sheets/detail/antimicrobial-](https://www.who.int/news-room/fact-sheets/detail/antimicrobial-resistance)  
547 [resistance.](https://www.who.int/news-room/fact-sheets/detail/antimicrobial-resistance)
  - 548 11. Tiseo, K., Huber, L., Gilbert, M., Robinson, T. P. & Van Boeckel, T. P. Global Trends in  
549 Antimicrobial Use in Food Animals from 2017 to 2030. *Antibiotics (Basel)* **9**, (2020).
  - 550 12. Thanner, S., Drissner, D. & Walsh, F. Antimicrobial Resistance in Agriculture. *MBio* **7**,  
551 e02227-15 (2016).

- 552 13. Van Boeckel, T. P. *et al.* Global trends in antimicrobial use in food animals. *Proc. Natl.*  
553 *Acad. Sci. U. S. A.* **112**, 5649–5654 (2015).
- 554 14. Patel, S. J., Wellington, M., Shah, R. M. & Ferreira, M. J. Antibiotic Stewardship in Food-  
555 producing Animals: Challenges, Progress, and Opportunities. *Clin. Ther.* **42**, 1649–1658  
556 (2020).
- 557 15. Lekagul, A., Tangcharoensathien, V. & Yeung, S. Patterns of antibiotic use in global pig  
558 production: A systematic review. *Vet Anim Sci* **7**, 100058 (2019).
- 559 16. Góchez, D., Jeannin, M., Moulin, G. & Marcos, J. Y. Sixth annual report on antimicrobial  
560 agents intended for use in animals. 1–135 (2022).
- 561 17. Góchez, D., Jeannin, M., Moulin, G. & Erlacher-Vindel, E. Annual Report on Antimicrobial  
562 Agents Intended for Use in Animals, Fifth Report. (2021).
- 563 18. Góchez, D., Jeannin, M., Moulin, G. & Erlacher-Vindel, E. Annual Report on Antimicrobial  
564 Agents Intended for Use in Animals, Fourth Report. Preprint at  
565 <https://www.woah.org/app/uploads/2021/03/a-fourth-annual-report-amr.pdf> (2020).
- 566 19. Gochez, D., Moulin, G., Raicek, M. & Erlacher-Vindel, E. OIE annual report on  
567 antimicrobials agents intended for use in animals. Better understanding of the global  
568 situation, Third Report. 1–131 (2018).
- 569 20. Yang, H. *et al.* Antibiotic Application and Resistance in Swine Production in China: Current  
570 Situation and Future Perspectives. *Front Vet Sci* **6**, 136 (2019).
- 571 21. Krishnasamy, V., Otte, J. & Silbergeld, E. Antimicrobial use in Chinese swine and broiler  
572 poultry production. *Antimicrob. Resist. Infect. Control* **4**, 17 (2015).
- 573 22. Toya, R., Sasaki, Y., Uemura, R. & Sueyoshi, M. Indications and patterns of antimicrobial  
574 use in pig farms in the southern Kyushu, Japan: large amounts of tetracyclines used to  
575 treat respiratory disease in post-weaning and fattening pigs. *J. Vet. Med. Sci.* **83**, 322–328  
576 (2021).
- 577 23. Lekagul, A., Tangcharoensathien, V., Mills, A., Rushton, J. & Yeung, S. How antibiotics are

- 578 used in pig farming: a mixed-methods study of pig farmers, feed mills and veterinarians in  
579 Thailand. *BMJ Glob Health* **5**, e001918 (2020).
- 580 24. Osei Sekyere, J. Antibiotic Types and Handling Practices in Disease Management among  
581 Pig Farms in Ashanti Region, Ghana. *J Vet Med* **2014**, 531952 (2014).
- 582 25. Kimera, Z. I., Mshana, S. E., Rweyemamu, M. M., Mboera, L. E. G. & Matee, M. I. N.  
583 Antimicrobial use and resistance in food-producing animals and the environment: an  
584 African perspective. *Antimicrob. Resist. Infect. Control* **9**, 37 (2020).
- 585 26. Mshana, S. E., Sindato, C., Matee, M. I. & Mboera, L. E. G. Antimicrobial Use and  
586 Resistance in Agriculture and Food Production Systems in Africa: A Systematic Review.  
587 *Antibiotics (Basel)* **10**, (2021).
- 588 27. Di Cerbo, A., Pezzuto, F., Guidetti, G., Canello, S. & Corsi, L. Tetracyclines: insights and  
589 updates of their use in human and animal pathology and their potential toxicity. *Open*  
590 *Biochem. J.* **13**, (2019).
- 591 28. Chopra, I. & Roberts, M. Tetracycline antibiotics: mode of action, applications, molecular  
592 biology, and epidemiology of bacterial resistance. *Microbiol. Mol. Biol. Rev.* **65**, 232–60 ;  
593 second page, table of contents (2001).
- 594 29. Gargiullo, L., Del Chierico, F., D'Argenio, P. & Putignani, L. Gut Microbiota Modulation for  
595 Multidrug-Resistant Organism Decolonization: Present and Future Perspectives. *Front.*  
596 *Microbiol.* **10**, 1704 (2019).
- 597 30. Brinkac, L., Voorhies, A., Gomez, A. & Nelson, K. E. The Threat of Antimicrobial  
598 Resistance on the Human Microbiome. *Microb. Ecol.* **74**, 1001–1008 (2017).
- 599 31. Carr, V. R. *et al.* Abundance and diversity of resistomes differ between healthy human oral  
600 cavities and gut. *Nat. Commun.* **11**, 693 (2020).
- 601 32. Maestre-Carballea, L., Navarro-López, V. & Martínez-García, M. A Resistome Roadmap:  
602 From the Human Body to Pristine Environments. *Front. Microbiol.* **13**, 858831 (2022).
- 603 33. Zhang, L., Huang, Y., Zhou, Y., Buckley, T. & Wang, H. H. Antibiotic administration routes

- 604 significantly influence the levels of antibiotic resistance in gut microbiota. *Antimicrob.*  
605 *Agents Chemother.* **57**, 3659–3666 (2013).
- 606 34. Bottery, M. J., Pitchford, J. W. & Friman, V.-P. Ecology and evolution of antimicrobial  
607 resistance in bacterial communities. *ISME J.* **15**, 939–948 (2021).
- 608 35. Blázquez, J., Rodríguez-Beltrán, J. & Matic, I. Antibiotic-Induced Genetic Variation: How It  
609 Arises and How It Can Be Prevented. *Annu. Rev. Microbiol.* **72**, 209–230 (2018).
- 610 36. Zhao, F. *et al.* Sequencing and genetic variation of multidrug resistance plasmids in  
611 *Klebsiella pneumoniae*. *PLoS One* **5**, e10141 (2010).
- 612 37. Ishengoma, V. L. *et al.* 28 In-feed or In-water Antibiotic Administration Did Not Influence  
613 the Fecal Prevalence and Antimicrobial Susceptibility Profiles of Salmonella in Piglets. *J.*  
614 *Anim. Sci.* **99**, 26–27 (2021).
- 615 38. Ishengoma, V. L. *et al.* 18 Impact of in-feed vs. in-water antibiotic administrations on the  
616 fecal prevalence and antimicrobial susceptibilities of Campylobacter and Salmonella in  
617 piglets. *J. Anim. Sci.* **98**, 35–36 (2020).
- 618 39. Ishengoma, V. L. Impact of in-feed versus in-water chlortetracycline and tiamulin  
619 administrations on fecal prevalence and antimicrobial susceptibilities of Campylobacter and  
620 Salmonella in a population of nursery piglets. (2021).
- 621 40. Hutchens, W. M. *et al.* Evaluating the route of antibiotic administration and its effect on  
622 nursery pig growth performance. vols. 6, Issue 10 (2020).
- 623 41. The ARRIVE guidelines 2.0. *ARRIVE Guidelines* [https://arriveguidelines.org/arrive-](https://arriveguidelines.org/arrive-guidelines)  
624 [guidelines](https://arriveguidelines.org/arrive-guidelines).
- 625 42. Eren, A. M. *et al.* Community-led, integrated, reproducible multi-omics with anvio. *Nat*  
626 *Microbiol* **6**, 3–6 (2021).
- 627 43. Shaiber, A. *et al.* Functional and genetic markers of niche partitioning among enigmatic  
628 members of the human oral microbiome. *Genome Biol.* **21**, 292 (2020).
- 629 44. Köster, J. & Rahmann, S. Snakemake--a scalable bioinformatics workflow engine.

- 630 *Bioinformatics* **28**, 2520–2522 (2012).
- 631 45. Mölder, F. *et al.* Sustainable data analysis with Snakemake. *F1000Res.* **10**, 33 (2021).
- 632 46. Minoche, A. E., Dohm, J. C. & Himmelbauer, H. Evaluation of genomic high-throughput  
633 sequencing data generated on Illumina HiSeq and Genome Analyzer systems. *Genome*  
634 *Biol.* **12**, R112 (2011).
- 635 47. Li, D., Liu, C.-M., Luo, R., Sadakane, K. & Lam, T.-W. MEGAHIT: an ultra-fast single-node  
636 solution for large and complex metagenomics assembly via succinct de Bruijn graph.  
637 *Bioinformatics* **31**, 1674–1676 (2015).
- 638 48. Hyatt, D. *et al.* Prodigal: prokaryotic gene recognition and translation initiation site  
639 identification. *BMC Bioinformatics* **11**, 119 (2010).
- 640 49. HMMER. <http://hmmer.org/>.
- 641 50. COG - NCBI. <https://www.ncbi.nlm.nih.gov/research/cog>.
- 642 51. Kanehisa, M. & Goto, S. KEGG: kyoto encyclopedia of genes and genomes. *Nucleic Acids*  
643 *Res.* **28**, 27–30 (2000).
- 644 52. Langmead, B. & Salzberg, S. L. Fast gapped-read alignment with Bowtie 2. *Nat. Methods*  
645 **9**, 357–359 (2012).
- 646 53. Langmead, B., Wilks, C., Antonescu, V. & Charles, R. Scaling read aligners to hundreds of  
647 threads on general-purpose processors. *Bioinformatics* **35**, 421–432 (2019).
- 648 54. Danecek, P. *et al.* Twelve years of SAMtools and BCFtools. *Gigascience* **10**, (2021).
- 649 55. Alneberg, J. *et al.* Binning metagenomic contigs by coverage and composition. *Nat.*  
650 *Methods* **11**, 1144–1146 (2014).
- 651 56. Alneberg, J. *et al.* CONCOCT: Clustering cONtigs on COverage and ComposiTiOn. *arXiv*  
652 *[q-bio.GN]* (2013).
- 653 57. Murat Eren, A. *et al.* Anvi'o: an advanced analysis and visualization platform for 'omics  
654 data. *PeerJ* **3**, e1319 (2015).
- 655 58. Aguilera, G. *et al.* Assessing the performance of single-copy genes for recovering robust



- 656 phylogenies. *Syst. Biol.* **57**, 613–627 (2008).
- 657 59. Quince, C. *et al.* DESMAN: a new tool for de novo extraction of strains from metagenomes.  
658 *Genome Biol.* **18**, 181 (2017).
- 659 60. RStudio Team. RStudio: Integrated Development Environment for R. RStudio.,  
660 <https://www.rstudio.com/> (2020).
- 661 61. pheatmap function - RDocumentation.  
662 <https://www.rdocumentation.org/packages/pheatmap/versions/1.0.12/topics/pheatmap>.
- 663 62. Villanueva, R. A. M. & Chen, Z. J. ggplot2: Elegant Graphics for Data Analysis (2nd ed.).  
664 *Measurement* **17**, 160–167 (2019).
- 665 63. Wickham, H. forcats: Tools for Working with Categorical Variables (Factors). (2022).
- 666 64. Wickham H, François R, Henry L, Müller K. dplyr: A Grammar of Data Manipulation.  
667 (2022).
- 668 65. ggplot2 Based Publication Ready Plots. <https://rpkgs.datanovia.com/ggpubr/index.html>.
- 669 66. Cabrera-Alarcon, J. L., Martinez, J. G., Enríquez, J. A. & Sánchez-Cabo, F. Variant  
670 pathogenic prediction by locus variability: the importance of the current picture of evolution.  
671 *Eur. J. Hum. Genet.* **30**, 555–559 (2022).
- 672 67. Wickham, H. *et al.* Welcome to the tidyverse. *J. Open Source Softw.* **4**, 1686 (2019).
- 673 68. Wickham, H. Simple, Consistent Wrappers for Common String Operations. *R package*  
674 *versión* (2019).
- 675 69. Lu, Z. L. & Yuan, K.-H. Y.-H. Welch's t test. *ResearchGate*  
676 [https://www.researchgate.net/profile/Zhenqiu-](https://www.researchgate.net/profile/Zhenqiu-Lu/publication/301292970_Welch's_t_test/links/57100dbd08ae68dc79097006/Welchs-t-test.pdf)  
677 [Lu/publication/301292970\\_Welch's\\_t\\_test/links/57100dbd08ae68dc79097006/Welchs-t-](https://www.researchgate.net/profile/Zhenqiu-Lu/publication/301292970_Welch's_t_test/links/57100dbd08ae68dc79097006/Welchs-t-test.pdf)  
678 [test.pdf](https://www.researchgate.net/profile/Zhenqiu-Lu/publication/301292970_Welch's_t_test/links/57100dbd08ae68dc79097006/Welchs-t-test.pdf).
- 679 70. Developers, I. W. Inkscape. <https://inkscape.org/>.
- 680 71. Setubal, J. C. Metagenome-assembled genomes: concepts, analogies, and challenges.  
681 *Biophys. Rev.* **13**, 905–909 (2021).

- 682 72. Land, M. *et al.* Insights from 20 years of bacterial genome sequencing. *Funct. Integr.*  
683 *Genomics* **15**, 141–161 (2015).
- 684 73. Bengtsson-Palme, J., Kristiansson, E. & Larsson, D. G. J. Environmental factors  
685 influencing the development and spread of antibiotic resistance. *FEMS Microbiol. Rev.* **42**,  
686 (2018).
- 687 74. Blázquez, J., Couce, A., Rodríguez-Beltrán, J. & Rodríguez-Rojas, A. Antimicrobials as  
688 promoters of genetic variation. *Curr. Opin. Microbiol.* **15**, 561–569 (2012).
- 689 75. Obolski, U. & Hadany, L. Implications of stress-induced genetic variation for minimizing  
690 multidrug resistance in bacteria. *BMC Med.* **10**, 89 (2012).
- 691 76. Murat Eren, A., Delmont, T. O. & Kiefl, E. Studying microbial population genetics with  
692 anv'io. *Meren Lab* <https://merenlab.org/2015/07/20/analyzing-variability/>.
- 693 77. Bohlin, J. *et al.* Relative entropy differences in bacterial chromosomes, plasmids, phages  
694 and genomic islands. *BMC Genomics* **13**, 66 (2012).
- 695 78. Bohlin, J., Brynildsrud, O. B., Sekse, C. & Snipen, L. An evolutionary analysis of genome  
696 expansion and pathogenicity in *Escherichia coli*. *BMC Genomics* **15**, 882 (2014).
- 697 79. Liu, Z., Venkatesh, S. S. & Maley, C. C. Sequence space coverage, entropy of genomes  
698 and the potential to detect non-human DNA in human samples. *BMC Genomics* **9**, 509  
699 (2008).
- 700 80. Krieg, N. R., Ludwig, W., Euzéby, J. & Whitman, W. B. Phylum XIV. Bacteroidetes phyl.  
701 nov. in *Bergey's Manual® of Systematic Bacteriology: Volume Four The Bacteroidetes,*  
702 *Spirochaetes, Tenericutes (Mollicutes), Acidobacteria, Fibrobacteres, Fusobacteria,*  
703 *Dictyoglomi, Gemmatimonadetes, Lentisphaerae, Verrucomicrobia, Chlamydiae, and*  
704 *Planctomycetes* (eds. Krieg, N. R. et al.) 25–469 (Springer New York, 2010).
- 705 81. Zhang, D. *et al.* Changes in the diversity and composition of gut microbiota of weaned  
706 piglets after oral administration of *Lactobacillus* or an antibiotic. *Appl. Microbiol. Biotechnol.*  
707 **100**, 10081–10093 (2016).

- 708 82. Li, H. *et al.* Effects of several in-feed antibiotic combinations on the abundance and  
709 diversity of fecal microbes in weaned pigs. *Can. J. Microbiol.* **63**, 402–410 (2017).
- 710 83. Tunsagool, P. *et al.* Metagenomics of antimicrobial and heavy metal resistance in the cecal  
711 microbiome of fattening pigs raised without antibiotics. *Appl. Environ. Microbiol.* (2021)  
712 doi:10.1128/AEM.02684-20.
- 713 84. Champion, K. M., Helaszek, C. T. & White, B. A. Analysis of antibiotic susceptibility and  
714 extrachromosomal DNA content of *Ruminococcus albus* and *Ruminococcus flavefaciens*.  
715 *Can. J. Microbiol.* (2011) doi:10.1139/m88-196.
- 716 85. Liu, H. Y., Li, X., Zhu, X., Dong, W. G. & Yang, G. Q. Soybean oligosaccharides attenuate  
717 odour compounds in excreta by modulating the caecal microbiota in broilers. *Animal* **15**,  
718 100159 (2021).
- 719 86. Hong, Y. *et al.* Preliminary Study on the Effect of *Bacillus amyloliquefaciens* TL on Cecal  
720 Bacterial Community Structure of Broiler Chickens. *Biomed Res. Int.* **2019**, 5431354  
721 (2019).
- 722 87. Revitt-Mills, S. A. & Robinson, A. Antibiotic-Induced Mutagenesis: Under the Microscope.  
723 *Front. Microbiol.* **11**, 585175 (2020).
- 724 88. Couce, A. & Blázquez, J. Side effects of antibiotics on genetic variability. *FEMS Microbiol.*  
725 *Rev.* **33**, 531–538 (2009).
- 726 89. Grossman, T. H. Tetracycline Antibiotics and Resistance. *Cold Spring Harb. Perspect.*  
727 *Med.* **6**, a025387 (2016).
- 728 90. Matsuo, T. *et al.* SmdAB, a heterodimeric ABC-Type multidrug efflux pump, in *Serratia*  
729 *marcescens*. *J. Bacteriol.* **190**, 648–654 (2008).
- 730 91. Li, X.-Z. & Nikaido, H. Efflux-mediated drug resistance in bacteria: an update. *Drugs* **69**,  
731 1555–1623 (2009).
- 732 92. Jin, M. *et al.* Antidepressant fluoxetine induces multiple antibiotics resistance in  
733 *Escherichia coli* via ROS-mediated mutagenesis. *Environ. Int.* **120**, 421–430 (2018).

- 734 93. Zhang, D., Hu, Y., Zhu, Q., Huang, J. & Chen, Y. Proteomic interrogation of antibiotic  
735 resistance and persistence in *Escherichia coli* - progress and potential for medical  
736 research. *Expert Rev. Proteomics* **17**, 393–409 (2020).
- 737 94. Patrick, C. A. *et al.* Proteomic Profiling, Transcription Factor Modeling, and Genomics of  
738 Evolved Tolerant Strains Elucidate Mechanisms of Vanillin Toxicity in *Escherichia coli*.  
739 *mSystems* **4**, (2019).
- 740 95. Ferjani, S. *et al.* Polymorphism of *ftsI* gene in *Haemophilus influenzae* and emergence of  
741 cefotaxime resistance in two Tunisian hospitals. *New Microbes New Infect* **36**, 100690  
742 (2020).
- 743 96. Chen, S. *et al.* Contribution of target gene mutations and efflux to decreased susceptibility  
744 of *Salmonella enterica* serovar typhimurium to fluoroquinolones and other antimicrobials.  
745 *Antimicrob. Agents Chemother.* **51**, 535–542 (2007).
- 746 97. Adler, M., Anjum, M., Andersson, D. I. & Sandegren, L. Combinations of mutations in *envZ*,  
747 *ftsI*, *mrdA*, *acrB* and *acrR* can cause high-level carbapenem resistance in *Escherichia coli*.  
748 *J. Antimicrob. Chemother.* **71**, 1188–1198 (2016).
- 749 98. Cain, B. D., Norton, P. J., Eubanks, W., Nick, H. S. & Allen, C. M. Amplification of the *bacA*  
750 gene confers bacitracin resistance to *Escherichia coli*. *J. Bacteriol.* **175**, 3784–3789 (1993).
- 751 99. Wong, W.-T. *et al.* Structural studies of the mechanism for biosensing antibiotics in a  
752 fluorescein-labeled  $\beta$ -lactamase. *BMC Struct. Biol.* **11**, 15 (2011).
- 753 100. Jacoby George A. AmpC  $\beta$ -Lactamases. *Clin. Microbiol. Rev.* **22**, 161–182 (2009).
- 754 101. Rivera, I., Molina, R., Lee, M., Mobashery, S. & Hermoso, J. A. Orthologous and  
755 Paralogous AmpD Peptidoglycan Amidases from Gram-Negative Bacteria. *Microb. Drug*  
756 *Resist.* **22**, 470–476 (2016).
- 757 102. Hou, Z. *et al.* Restoration of antibiotic susceptibility in methicillin-resistant *Staphylococcus*  
758 *aureus* by targeting *mecR1* with a phosphorothioate deoxyribozyme. *Clin. Exp. Pharmacol.*  
759 *Physiol.* **34**, 1160–1164 (2007).

- 760 103. García-Bayona, L. & Comstock, L. E. Streamlined Genetic Manipulation of Diverse  
761 Bacteroides and Parabacteroides Isolates from the Human Gut Microbiota. *MBio* **10**,  
762 (2019).
- 763 104. Ding, Y., Onodera, Y., Lee, J. C. & Hooper, D. C. NorB, an efflux pump in *Staphylococcus*  
764 aureus strain MW2, contributes to bacterial fitness in abscesses. *J. Bacteriol.* **190**, 7123–  
765 7129 (2008).
- 766 105. Puértolas-Balint, F., Warsi, O., Linkevicius, M., Tang, P.-C. & Andersson, D. I. Mutations  
767 that increase expression of the EmrAB-TolC efflux pump confer increased resistance to  
768 nitroxoline in *Escherichia coli*. *J. Antimicrob. Chemother.* **75**, 300–308 (2020).
- 769 106. Meberg, B. M., Sailer, F. C., Nelson, D. E. & Young, K. D. Reconstruction of *Escherichia*  
770 coli mrcA (PBP 1a) mutants lacking multiple combinations of penicillin binding proteins. *J.*  
771 *Bacteriol.* **183**, 6148–6149 (2001).
- 772 107. Sun, S., Selmer, M. & Andersson, D. I. Resistance to  $\beta$ -lactam antibiotics conferred by  
773 point mutations in penicillin-binding proteins PBP3, PBP4 and PBP6 in *Salmonella*  
774 enterica. *PLoS One* **9**, e97202 (2014).
- 775 108. Roberts, M. C. Update on acquired tetracycline resistance genes. *FEMS Microbiol. Lett.*  
776 **245**, 195–203 (2005).
- 777 109. Paukner, S. & Riedl, R. Pleuromutilins: Potent Drugs for Resistant Bugs-Mode of Action  
778 and Resistance. *Cold Spring Harb. Perspect. Med.* **7**, (2017).
- 779 110. Keeney, D., Ruzin, A., McAleese, F., Murphy, E. & Bradford, P. A. MarA-mediated  
780 overexpression of the AcrAB efflux pump results in decreased susceptibility to tigecycline  
781 in *Escherichia coli*. *J. Antimicrob. Chemother.* **61**, 46–53 (2008).
- 782 111. Langevin, A. M., El Meouche, I. & Dunlop, M. J. Mapping the Role of AcrAB-TolC Efflux  
783 Pumps in the Evolution of Antibiotic Resistance Reveals Near-MIC Treatments Facilitate  
784 Resistance Acquisition. *mSphere* **5**, (2020).
- 785 112. Atac, N. *et al.* The Role of AcrAB-TolC Efflux Pumps on Quinolone Resistance of *E. coli*

- 786 ST131. *Curr. Microbiol.* **75**, 1661–1666 (2018).
- 787 113. Kobayashi, N., Tamura, N., van Veen, H. W., Yamaguchi, A. & Murakami, S.  $\beta$ -Lactam  
788 selectivity of multidrug transporters AcrB and AcrD resides in the proximal binding pocket.  
789 *J. Biol. Chem.* **289**, 10680–10690 (2014).
- 790 114. Yerushalmi, H., Lebendiker, M. & Schuldiner, S. EmrE, an Escherichia coli 12-kDa  
791 Multidrug Transporter, Exchanges Toxic Cations and H<sup>+</sup> and Is Soluble in Organic  
792 Solvents (\*). *J. Biol. Chem.* **270**, 6856–6863 (1995).
- 793 115. Nasie, I., Steiner-Mordoch, S. & Schuldiner, S. New substrates on the block: clinically  
794 relevant resistances for EmrE and homologues. *J. Bacteriol.* **194**, 6766–6770 (2012).
- 795 116. Ma, J. *et al.* Characteristic antimicrobial resistance of clinically isolated *Stenotrophomonas*  
796 *maltophilia* CYZ via complete genome sequence. *J Glob Antimicrob Resist* **23**, 186–193  
797 (2020).
- 798 117. Moussatova, A., Kandt, C., O'Mara, M. L. & Tieleman, D. P. ATP-binding cassette  
799 transporters in Escherichia coli. *Biochim. Biophys. Acta* **1778**, 1757–1771 (2008).
- 800 118. KEGG ORTHOLOGY: K18890. <https://www.genome.jp/entry/K18890>.
- 801 119. Mora, I., Cabrefiga, J. & Montesinos, E. Antimicrobial peptide genes in *Bacillus* strains from  
802 plant environments. *Int. Microbiol.* **14**, 213–223 (2011).
- 803 120. Jahantigh, M., Samadi, K., Dizaji, R. E. & Salari, S. Antimicrobial resistance and  
804 prevalence of tetracycline resistance genes in Escherichia coli isolated from lesions of  
805 colibacillosis in broiler chickens in Sistan, Iran. *BMC Vet. Res.* **16**, 267 (2020).
- 806 121. Yang, S. *et al.* Removal of chlortetracycline and antibiotic resistance genes in soil by  
807 earthworms (epigeic *Eisenia fetida* and endogeic *Metaphire guillelmi*). *Sci. Total Environ.*  
808 **781**, 146679 (2021).
- 809 122. Kim, J. & Ahn, J. Emergence and spread of antibiotic-resistant foodborne pathogens from  
810 farm to table. *Food Sci. Biotechnol.* 1–19 (2022).
- 811 123. Yousefian, N. *et al.* Structural characterization of the EmrAB-TolC efflux complex from E.

- 812 *coli. Biochim. Biophys. Acta Biomembr.* **1863**, 183488 (2021).
- 813 124. Kim, J., Cater, R. J., Choy, B. C. & Mancía, F. Structural Insights into Transporter-Mediated  
814 Drug Resistance in Infectious Diseases. *J. Mol. Biol.* **433**, 167005 (2021).
- 815 125. Ferrand, A., Vergalli, J., Pagès, J.-M. & Davin-Regli, A. An Intertwined Network of  
816 Regulation Controls Membrane Permeability Including Drug Influx and Efflux in  
817 Enterobacteriaceae. *Microorganisms* **8**, (2020).
- 818 126. Du, D. *et al.* Multidrug efflux pumps: structure, function and regulation. *Nat. Rev. Microbiol.*  
819 **16**, 523–539 (2018).
- 820 127. Breijyeh, Z., Jubeh, B. & Karaman, R. Resistance of Gram-Negative Bacteria to Current  
821 Antibacterial Agents and Approaches to Resolve It. *Molecules* **25**, (2020).
- 822 128. Bouza, E. & Finch, R. Infections caused by Gram-positive bacteria: situation and  
823 challenges of treatment. *Clin. Microbiol. Infect.* **7 Suppl 4**, iii (2001).
- 824 129. Mayr, F. B., Yende, S. & Angus, D. C. Epidemiology of severe sepsis. *Virulence* **5**, 4–11  
825 (2014).
- 826 130. MacDermott-Opeskin, H. I., Gupta, V. & O'Mara, M. L. Lipid-mediated antimicrobial  
827 resistance: a phantom menace or a new hope? *Biophys. Rev.* **14**, 145–162 (2022).
- 828 131. Henderson, P. J. F. *et al.* Physiological Functions of Bacterial “Multidrug” Efflux Pumps.  
829 *Chem. Rev.* **121**, 5417–5478 (2021).
- 830 132. Hassan, K. A., Liu, Q., Henderson, P. J. F. & Paulsen, I. T. Homologs of the *Acinetobacter*  
831 *baumannii* Acel transporter represent a new family of bacterial multidrug efflux systems.  
832 *MBio* **6**, (2015).
- 833 133. Werth, B. J. Beta-Lactams. *Merck Manuals Professional Edition*  
834 [https://www.merckmanuals.com/professional/infectious-diseases/bacteria-and-](https://www.merckmanuals.com/professional/infectious-diseases/bacteria-and-antibacterial-drugs/beta-lactams)  
835 [antibacterial-drugs/beta-lactams.](https://www.merckmanuals.com/professional/infectious-diseases/bacteria-and-antibacterial-drugs/beta-lactams)
- 836 134. Knight, G. M. *et al.* Addressing the Unknowns of Antimicrobial Resistance: Quantifying and  
837 Mapping the Drivers of Burden. *Clin. Infect. Dis.* **66**, 612–616 (2018).

- 838 135. Long, H. *et al.* Antibiotic treatment enhances the genome-wide mutation rate of target cells.  
839 *Proc. Natl. Acad. Sci. U. S. A.* **113**, E2498-505 (2016).
- 840 136. Diamantis, S. *et al.* The Production of Antibiotics Must Be Reoriented: Repositioning Old  
841 Narrow-Spectrum Antibiotics, Developing New Microbiome-Sparing Antibiotics. *Antibiotics*  
842 (*Basel*) **11**, (2022).
- 843 137. Sweileh, W. M. & Moh'd Mansour, A. Bibliometric analysis of global research output on  
844 antimicrobial resistance in the environment (2000-2019). *Glob Health Res Policy* **5**, 37  
845 (2020).
- 846 138. Michael, C. A., Dominey-Howes, D. & Labbate, M. The antimicrobial resistance crisis:  
847 causes, consequences, and management. *Front Public Health* **2**, 145 (2014).



848 **Figures**  
849

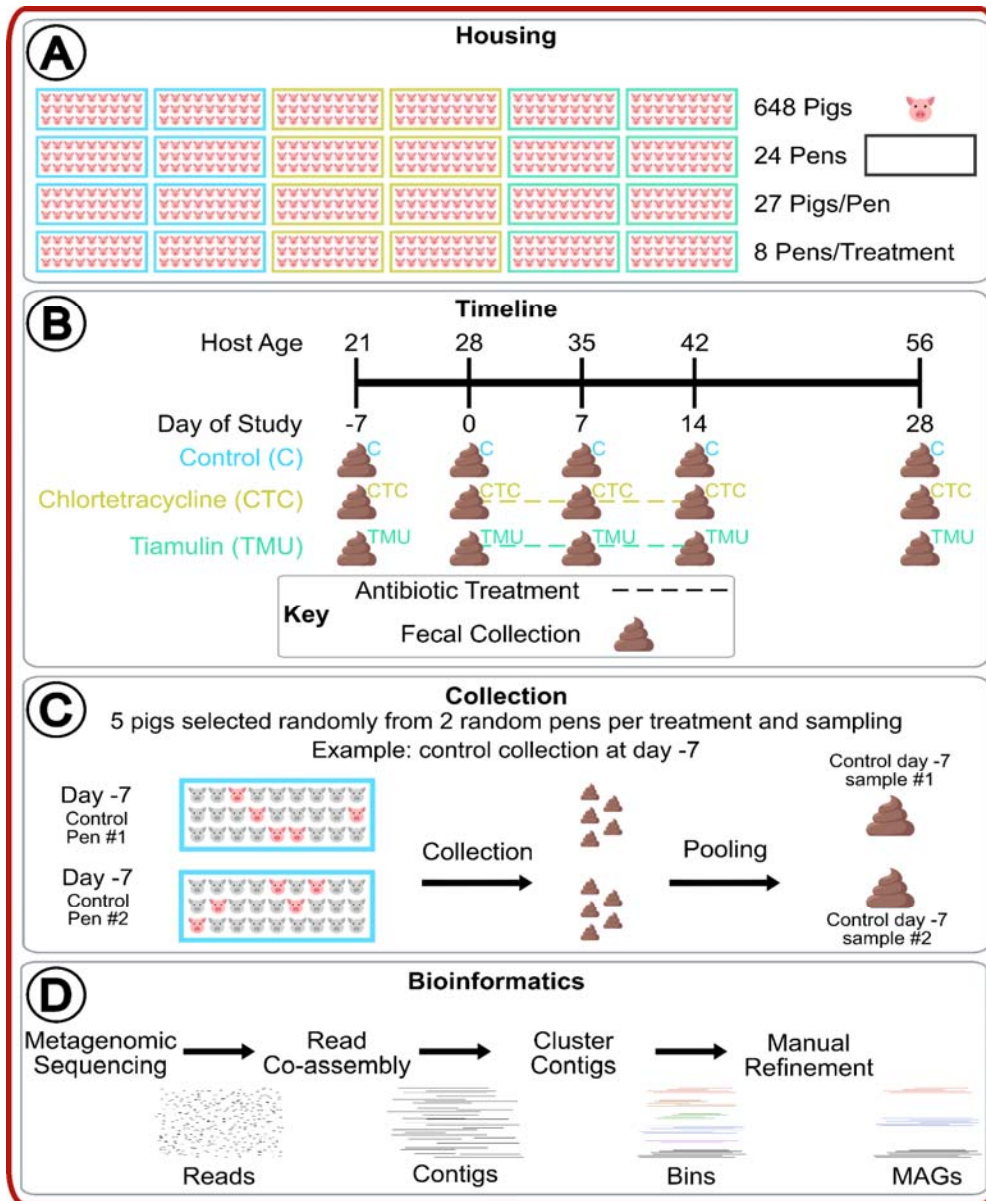

850  
851 Figure 1. A) Pig and pen housing\* allocation to treatments. B) Timeline of study. C)  
852 Fecal sample collection and pooling. D) Bioinformatics from sequencing reads to refined  
853 MAGs.

854 \*Image denotes pen treatments in same location for simplification. Note that pens were  
855 not all located in one region of room, instead pens were dispersed to control for  
856 adjoining pen interactions<sup>37-39</sup>.

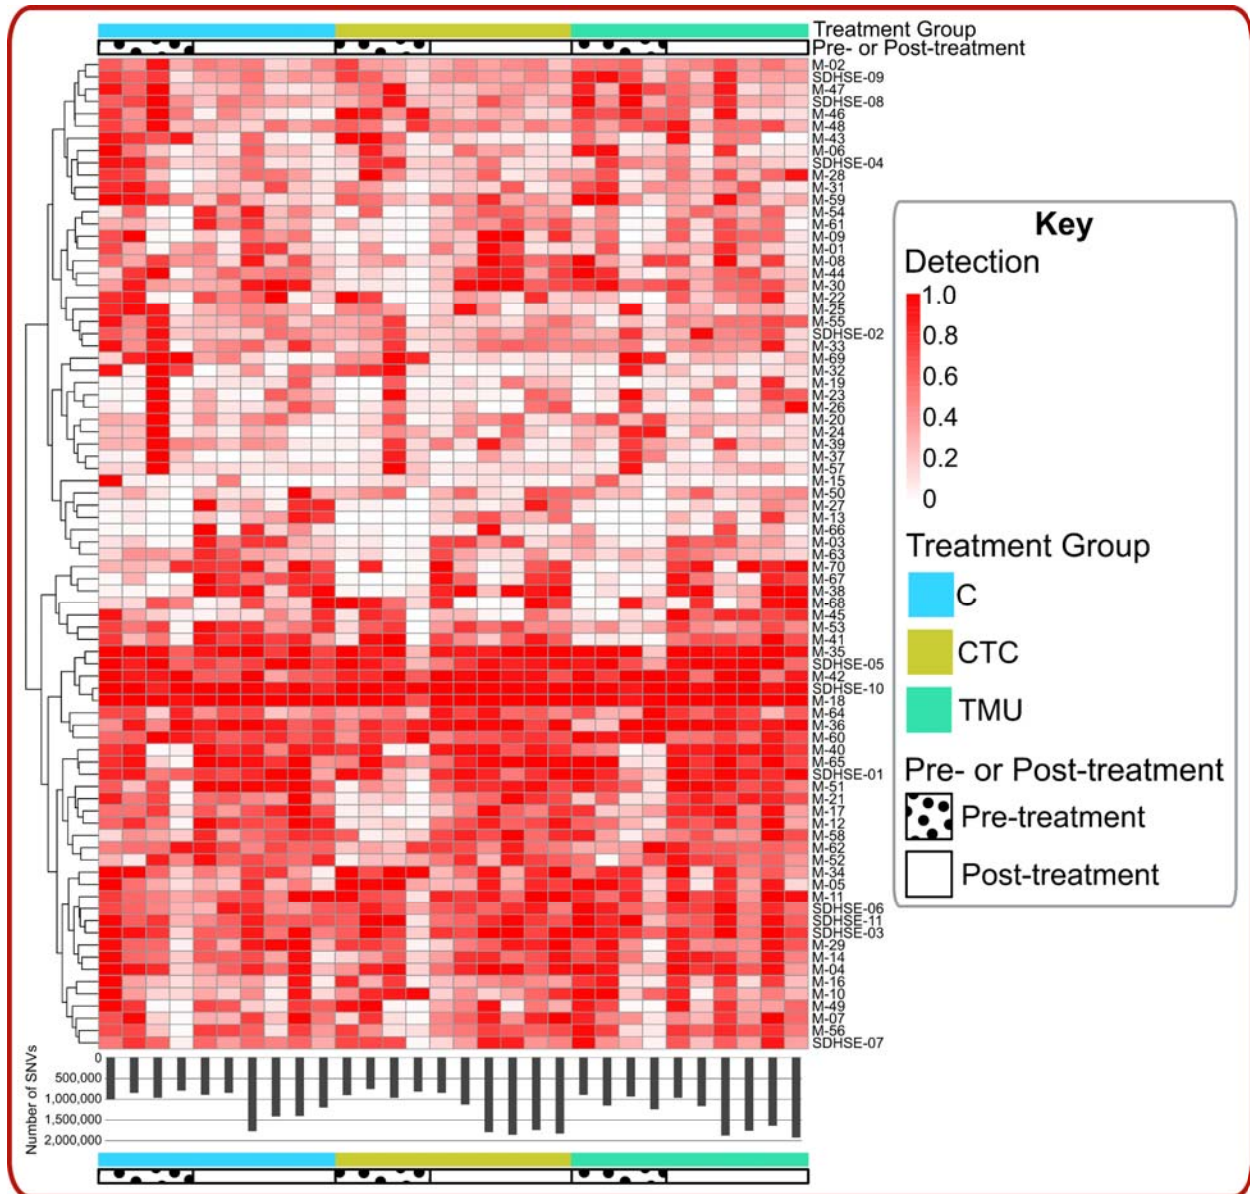

857  
858 Figure 2. MAG detection heatmap (top) and single nucleotide variants (SNVs; bottom)  
859 according to treatment group and pre-/post-treatment (from left to right is earliest  
860 sampling [day -7] to last sampling [day 28] per treatment group) per sample.

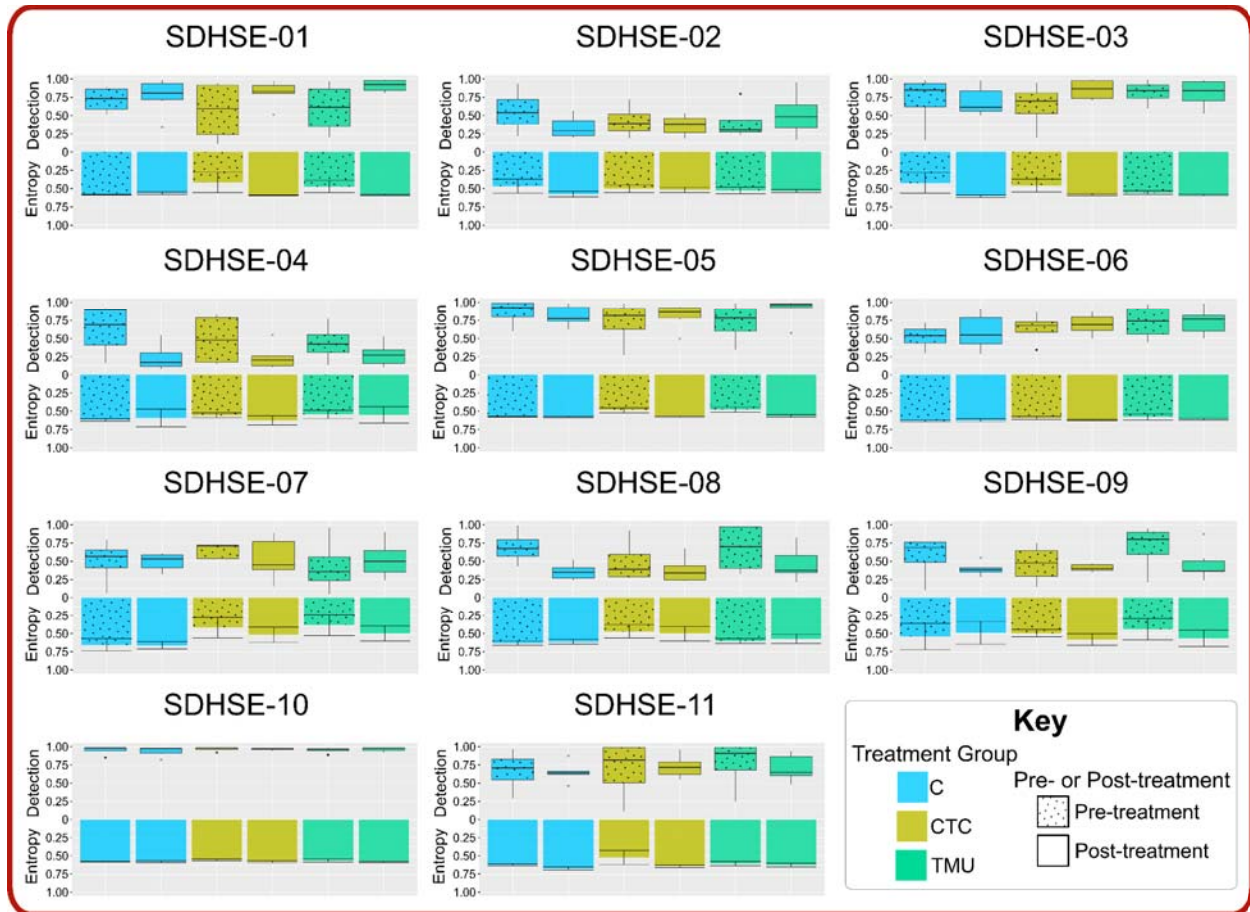

861  
862  
863

Figure 3. Detection boxplot and entropy bar graphs of our 11 sustained detection and high sustained entropy (SDHSE) MAGs.

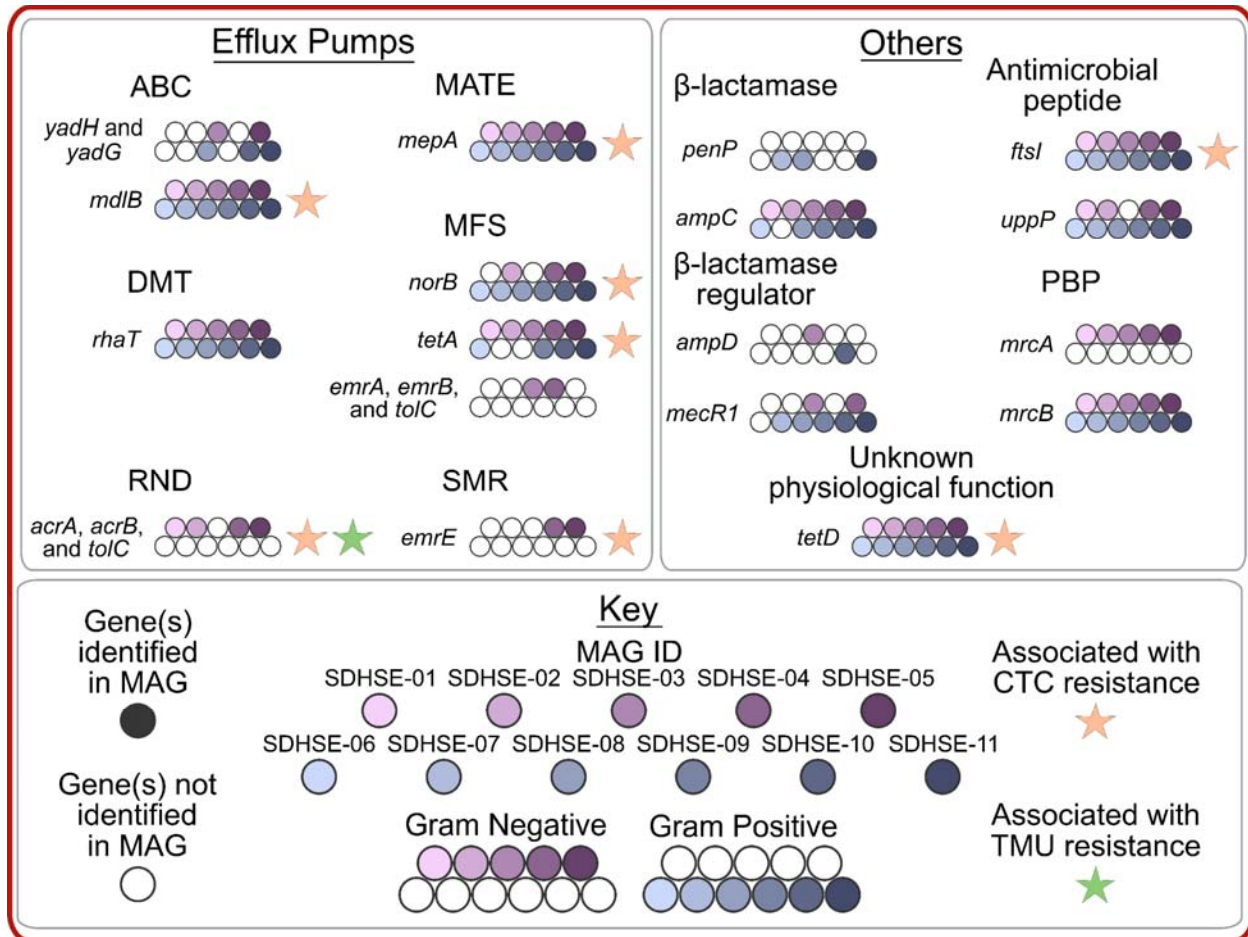

864

865

866

867

868

869

870

Figure 4. AMR genes detected in SDHSE MAGs annotated according to presence in our gram negative/positive MAGs and according to association with CTC (or tetracycline) or TMU (or pleuromutilin) previously<sup>89–126</sup>. Acronyms: ABC, ATP-binding cassette; MATE, multidrug and toxic compound extrusion; DMT, drug/metabolite transporter; MFS, major facilitator; RND, resistance-nodulation-division; SMR, small multidrug resistance; PBP, penicillin binding protein.

871 **Tables**

872

873 Table 1. Taxonomic assignment and assembly statistics, of sustained detection and high sustained entropy (SDHSE)

874 MAGs.

875

| MAG ID   | Total length (nucleotides) | Number of contigs | N50    | GC content | Percent completion | Percent redundancy | Domain   | Phylum       | Class       | Order           | Family             | Genus            | Species                      |
|----------|----------------------------|-------------------|--------|------------|--------------------|--------------------|----------|--------------|-------------|-----------------|--------------------|------------------|------------------------------|
| SDHSE-03 | 2,629,111                  | 365               | 15,755 | 44%        | 79%                | 7%                 | Bacteria | Bacteroidota | Bacteroidia | Bacteroidales   | Bacteroidaceae     | Prevotella       | N/A                          |
| SDHSE-04 | 2,458,376                  | 727               | 4,266  | 48%        | 93%                | 8%                 | Bacteria | Bacteroidota | Bacteroidia | Bacteroidales   | Bacteroidaceae     | UBA6382          | UBA6382 sp002439755          |
| SDHSE-01 | 2,343,180                  | 332               | 9,899  | 49%        | 96%                | 8%                 | Bacteria | Bacteroidota | Bacteroidia | Bacteroidales   | Muribaculaceae     | C941             | C941 sp004557565             |
| SDHSE-02 | 2,593,352                  | 391               | 11,592 | 51%        | 86%                | 8%                 | Bacteria | Bacteroidota | Bacteroidia | Bacteroidales   | UBA932             | RC9              | RC9 sp000431015              |
| SDHSE-05 | 2,812,877                  | 455               | 10,884 | 52%        | 87%                | 3%                 | Bacteria | Bacteroidota | Bacteroidia | Bacteroidales   | UBA932             | RC9              | RC9 sp000433355              |
| SDHSE-08 | 2,753,895                  | 203               | 29,028 | 41%        | 90%                | 6%                 | Bacteria | Firmicutes   | Clostridia  | Lachnospirales  | Lachnospiraceae    | Blautia          | N/A                          |
| SDHSE-10 | 2,095,569                  | 581               | 4,928  | 42%        | 94%                | 7%                 | Bacteria | Firmicutes   | Clostridia  | Oscillospirales | Acutalibacteraceae | Ruminococcus     | N/A                          |
| SDHSE-06 | 2,196,155                  | 223               | 21,375 | 52%        | 96%                | 1%                 | Bacteria | Firmicutes   | Clostridia  | Oscillospirales | Acutalibacteraceae | Ruminococcus     | Ruminococcus sp003531055     |
| SDHSE-07 | 2,289,369                  | 499               | 7,653  | 56%        | 80%                | 4%                 | Bacteria | Firmicutes   | Clostridia  | Oscillospirales | Oscillospiraceae   | CAG-170          | CAG-170 sp003516765          |
| SDHSE-11 | 2,034,772                  | 145               | 22,117 | 61%        | 87%                | 1%                 | Bacteria | Firmicutes   | Clostridia  | Oscillospirales | Ruminococcaceae    | Gemmiger         | Gemmiger sp004561545         |
| SDHSE-09 | 2,432,201                  | 438               | 8,763  | 54%        | 96%                | 8%                 | Bacteria | Firmicutes   | Clostridia  | Oscillospirales | Ruminococcaceae    | Ruthenibacterium | Ruthenibacterium sp002315015 |

876

877 Table 2. Antibiotic class resistance, based on previous publications and our annotated AMR and drug efflux genes, for our  
 878 SDHSE MAGs<sup>89-126</sup>; green filled boxes indicate resistance associated with gene(s) whereas white demonstrates no AMR  
 879 association.

| Antibiotic Class                  |          | $\beta$ -lactam | Fluoroquinolone | Glycylcycline | Sulfonamide | Tetracycline | Bacitracin | Quinolone | Chloramphenicol | Pleuromutilin | Aminoglycoside | Nitroquinoline | Sum Antibiotic Resistant Classes | Average | Standard Deviation |
|-----------------------------------|----------|-----------------|-----------------|---------------|-------------|--------------|------------|-----------|-----------------|---------------|----------------|----------------|----------------------------------|---------|--------------------|
| Gram Negative                     | SDHSE-01 | Green           | Green           | Green         | Green       | Green        | Green      | White     | Green           | Green         | White          | White          | 8                                | 8.8     | 1.7                |
|                                   | SDHSE-02 | Green           | Green           | Green         | Green       | Green        | Green      | Green     | Green           | Green         | White          | White          | 9                                |         |                    |
|                                   | SDHSE-03 | Green           | Green           | Green         | Green       | Green        | White      | White     | White           | White         | White          | Green          | 6                                |         |                    |
|                                   | SDHSE-04 | Green           | Green           | Green         | Green       | Green        | Green      | Green     | Green           | Green         | Green          | Green          | 11                               |         |                    |
|                                   | SDHSE-05 | Green           | Green           | Green         | Green       | Green        | Green      | Green     | Green           | Green         | Green          | White          | 10                               |         |                    |
| Gram Positive                     | SDHSE-06 | Green           | Green           | Green         | Green       | Green        | Green      | Green     | White           | White         | White          | White          | 7                                | 7       | 0.0                |
|                                   | SDHSE-07 | Green           | Green           | Green         | Green       | Green        | Green      | Green     | White           | White         | White          | White          | 7                                |         |                    |
|                                   | SDHSE-08 | Green           | Green           | Green         | Green       | Green        | Green      | Green     | White           | White         | White          | White          | 7                                |         |                    |
|                                   | SDHSE-09 | Green           | Green           | Green         | Green       | Green        | Green      | Green     | White           | White         | White          | White          | 7                                |         |                    |
|                                   | SDHSE-10 | Green           | Green           | Green         | Green       | Green        | Green      | Green     | White           | White         | White          | White          | 7                                |         |                    |
|                                   | SDHSE-11 | Green           | Green           | Green         | Green       | Green        | Green      | Green     | White           | White         | White          | White          | 7                                |         |                    |
| <b>MAGs with Resistance Genes</b> | Count    | 11              | 11              | 11            | 11          | 11           | 10         | 9         | 4               | 4             | 2              | 2              |                                  |         |                    |
|                                   | Percent  | 100%            | 100%            | 100%          | 100%        | 100%         | 91%        | 82%       | 36%             | 36%           | 18%            | 18%            |                                  |         |                    |

880 **Supplementary Files**

881  
882 Supplementary Table S1. Demographics (diet, birth date, housing group, etc.) of swine  
883 hosts and dams, and sample metadata (swine age, host ID, stage and general health  
884 information, etc.).

885  
886 Supplementary Table S2. Sequencing and assembly analysis including: metagenomic  
887 read counts initially obtained and assembly statistics according to co-assembly group.

888  
889 Supplementary Table S3. Anvi'o results from initial bins and resulting MAGs, including  
890 taxonomic classification<sup>42</sup>.

891  
892 Supplementary Table S4. Detection results from metagenome mapping to MAGs and  
893 SNV counts according to sample.

894  
895 Supplementary Table S5. Entropy results from anvi'o.

896  
897 Supplementary Table S6. Detection and entropy statistic results, and selection of  
898 SDHSE analysis.

899  
900 Supplementary Table S7. COG annotations, including AMR annotations and AMR  
901 annotation summary, for SDHSE MAGs. Acronyms: ABC, ATP-binding cassette; MATE,  
902 multidrug and toxic compound extrusion; DMT, drug/metabolite transporter; MFS, major  
903 facilitator; RND, resistance-nodulation-division; SMR, small multidrug resistance; AMP,  
904 antimicrobial peptide; PBP, penicillin binding protein.

905  
906 Supplementary Table S8. Antibiotic class resistance, based on previous publications,  
907 for our annotated AMR and drug efflux genes<sup>89-126</sup>; green filled boxes indicate  
908 resistance associated with gene(s) whereas white demonstrates no AMR association.  
909 Acronyms: ABC, ATP-binding cassette; MATE, multidrug and toxic compound extrusion;  
910 DMT, drug/metabolite transporter; MFS, major facilitator; RND, resistance-nodulation-

911 division; SMR, small multidrug resistance; AMP, antimicrobial peptide; PBP, penicillin  
912 binding protein.
